# Supplementary material for: Exploring leprosy perceptions in South Sulawesi, Indonesia: A mixed-methods study on knowledge, attitudes, practices, and stigma
Source: PLOS Glob Public Health. 2025 Dec 26;5(12):e0005675. doi: 10.1371/journal.pgph.0005675 (PMC12742724; doi:10.1371/journal.pgph.0005675)
Supplement: S1 Text — (DOCX) [file pgph.0005675.s001.docx]

**S1_Text. The detailed description of the model explaining the relationship between the dependent and independent variables using a Bayesian approach**

Let be the set of all variables under study, and for variable () let be the set of its categories, where and are the number of the categories of variable and the number of variables under study, respectively. Let also be the score of the measure for the participant, and is the th component of the non-reference categorical vector for the participant

where for

Our model is

The parameters of the model were estimated using a Bayesian approach. The prior distribution of the intercept , the slope , and the precision are is uniform where is the maximum score that probably can be achieved by a participant, , and for each for each , , , and .

With the reference category, there are categories for each variable . So, the complete categorical vector for the participant is

with the value of a component is 1 and 0 for the others. For instance, for the variable sex with female as the reference, female participants can be expressed as , and for male participants. Another example, for the variable education with the categories no-education (the reference), primary education, secondary education, and university education, the expression for the categories are , , , and , respectively. The list of the variables and the corresponding categories are as in the Table I. The analyses were performed in R version 4.3.3 and RStudio version 2024.04.0. For estimating the model parameters, we used WinBUGS version 1.4.3 from the https://www.mrc-bsu.cam.ac.uk page.

Table A. The list of the variables and the corresponding categories that were involved in the model

| **No ()** | **Variable ()** | **Number of Categories ()** | **Category ()** | |
| --- | --- | --- | --- | --- |
| 1 | Age | 3 | 1 | Age < 30 |
| 2 | Age 30-49 |
| 3 | Age >= 50 |
| 2 | Marital Status | 3 | 1 | Married/Living Together |
| 2 | Separated |
| 3 | Never Married |
| 3 | Education | 4 | 1 | No Education |
| 2 | Primary |
| 3 | Middle/Secondary |
| 4 | University |
| 4 | Occupation | 5 | 1 | Health Care Worker |
| 2 | Self-Employee |
| 3 | Farmer |
| 4 | Working in the Household |
| 5 | Temporary Work/Unemployed |
| 5 | Gender | 2 | 1 | Female |
| 2 | Male |
| 6 | Relationship with person affected by leprosy (PAL) | 2 | 1 | Have no Relationship with PAL |
| 2 | Have Relationship with PAL |
| 7 | Monthly household income (USD) | 4 | 1 | Income < 95 |
| 2 | Income 95-189 |
| 3 | Income >= 190 |
| 4 | Don't know/No Answer |
| 8 | Area of residence | 2 | 1 | Non-Urban |
| 2 | Urban |
